# Supplementary material
Source: PubMed Central journal article supplement (PMC7240652)
Supplement: jamacardiol-5-952-s003.pdf [file jamacardiol-5-952-s003.pdf]

## Supplementary Online Content

Gencer B, Mach F, Murphy SA, et al. Efficacy of evolocumab on cardiovascular outcomes in patients with recent myocardial infarction: a prespecified secondary analysis from the FOURIER trial. *JAMA Cardiol*. Published online May 20, 2020. doi:10.1001/jamacardio.2020.0882

**eFigure.** CONSORT diagram

**eTable 1.** Baseline characteristics of patients with recent vs remote MI in FOURIER

**eTable 2.** Achievement of recommended LDL-C targets at 4 weeks in patients with recent MI ( $\leq 12$  months) vs remote MI ( $> 12$  months)

**eTable 3.** Efficacy of evolocumab in patients with recent MI ( $\leq 12$  months) vs remote MI ( $> 12$  months)

**eTable 4.** Efficacy of evolocumab on the primary and key secondary end points by key subgroups

This supplementary material has been provided by the authors to give readers additional information about their work.

**eFigure.** CONSORT diagram

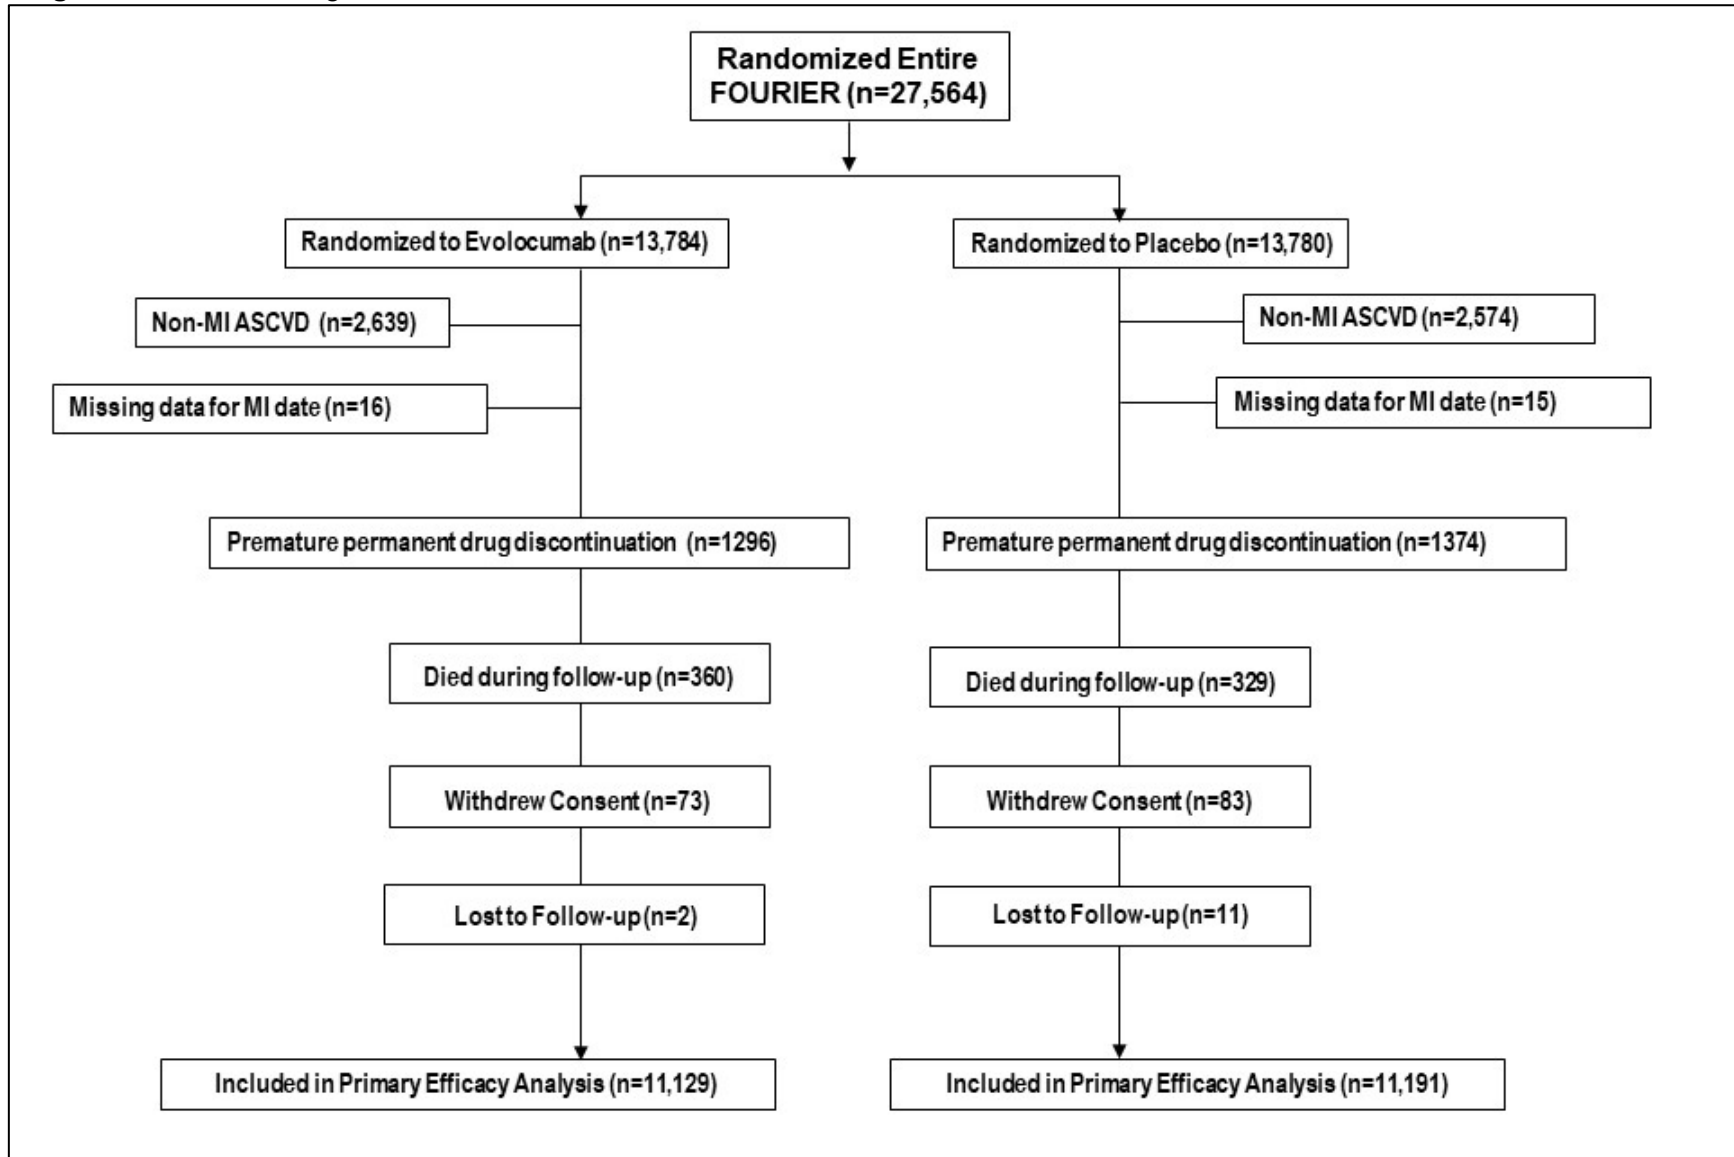

**eTable 1.** Baseline characteristics of patients with recent vs remote MI in FOURIER

| Characteristics                                                                                                                                                                                                                                                                                                                                                        | Recent MI ( $\leq 12$ months)<br>N=5711 | Remote MI ( $> 12$ months)<br>N=16 609 | P Value |
|------------------------------------------------------------------------------------------------------------------------------------------------------------------------------------------------------------------------------------------------------------------------------------------------------------------------------------------------------------------------|-----------------------------------------|----------------------------------------|---------|
| Demographics                                                                                                                                                                                                                                                                                                                                                           |                                         |                                        |         |
| Age, mean (SD), y                                                                                                                                                                                                                                                                                                                                                      | 59.6 (9.2)                              | 63.1 (8.8)                             | < 0.001 |
| Male sex, %                                                                                                                                                                                                                                                                                                                                                            | 4442 (77.8)                             | 13074 (78.7)                           | 0.14    |
| White race, %                                                                                                                                                                                                                                                                                                                                                          | 4870 (85.3)                             | 14322 (86.2)                           | 0.073   |
| Mean weight, mean (SD), kg                                                                                                                                                                                                                                                                                                                                             | 83.9 (16.5)                             | 86.4 (17.3)                            | < 0.001 |
| Region, %                                                                                                                                                                                                                                                                                                                                                              |                                         |                                        | < 0.001 |
| North America                                                                                                                                                                                                                                                                                                                                                          | 646 (11.3)                              | 3006 (18.1)                            |         |
| Europe                                                                                                                                                                                                                                                                                                                                                                 | 3874 (67.8)                             | 10239 (61.6)                           |         |
| Latin America                                                                                                                                                                                                                                                                                                                                                          | 423 (7.4)                               | 1133 (6.8)                             |         |
| Asia                                                                                                                                                                                                                                                                                                                                                                   | 768 (13.4)                              | 2231 (13.4)                            |         |
| Cardiovascular risk factors, %                                                                                                                                                                                                                                                                                                                                         |                                         |                                        |         |
| Hypertension                                                                                                                                                                                                                                                                                                                                                           | 4191 (73.4)                             | 13405 (80.7)                           | < 0.001 |
| Diabetes mellitus                                                                                                                                                                                                                                                                                                                                                      | 1699 (29.7)                             | 6163 (37.1)                            | < 0.001 |
| Current cigarette use                                                                                                                                                                                                                                                                                                                                                  | 1532 (26.8)                             | 4631 (27.9)                            | 0.13    |
| Time from most recent MI to randomization, median (IQR), years                                                                                                                                                                                                                                                                                                         | 0.4 (0.2-0.6)                           | 4.9 (2.7-9.8)                          | < 0.001 |
| History of stroke                                                                                                                                                                                                                                                                                                                                                      | 265 (4.6)                               | 1374 (8.3)                             | < 0.001 |
| History of peripheral artery disease                                                                                                                                                                                                                                                                                                                                   | 266 (4.7)                               | 1542 (9.3)                             | < 0.001 |
| $\geq 2$ Prior myocardial infarctions                                                                                                                                                                                                                                                                                                                                  | 1461 (25.6)                             | 3820 (23.0)                            | < 0.001 |
| Residual multivessel CAD*                                                                                                                                                                                                                                                                                                                                              | 1484 (26.0)                             | 4125 (24.9)                            | 0.085   |
| Prior coronary artery bypass graft                                                                                                                                                                                                                                                                                                                                     | 830 (14.6)                              | 3954 (23.9)                            | < 0.001 |
| Prior percutaneous coronary intervention                                                                                                                                                                                                                                                                                                                               | 4290 (75.2)                             | 10601 (63.9)                           | < 0.001 |
| Statin use, %                                                                                                                                                                                                                                                                                                                                                          |                                         |                                        | < 0.001 |
| High intensity                                                                                                                                                                                                                                                                                                                                                         | 4415 (77.3)                             | 11506 (69.3)                           |         |
| Moderate intensity                                                                                                                                                                                                                                                                                                                                                     | 1283 (22.5)                             | 5066 (30.5)                            |         |
| Ezetimibe, %                                                                                                                                                                                                                                                                                                                                                           | 186 (3.3)                               | 1051 (6.3)                             | < 0.001 |
| LDL-C, median (IQR), mg/dL                                                                                                                                                                                                                                                                                                                                             | 90 (79-105)                             | 93 (80-110)                            | < 0.001 |
| HDL-C, median (IQR), mg/dL                                                                                                                                                                                                                                                                                                                                             | 43 (36-51)                              | 44 (37-52)                             | < 0.001 |
| hsCRP, median (IQR), mg/L                                                                                                                                                                                                                                                                                                                                              | 1.8 (0.9-3.7)                           | 1.6 (0.8-3.4)                          | < 0.001 |
| eGFR $< 60$ mL/min/1.73m <sup>2</sup>                                                                                                                                                                                                                                                                                                                                  | 845 (14.8)                              | 3157 (19.0)                            | < 0.001 |
| CABG, coronary artery bypass graft; CAD, coronary artery disease; eGFR, estimated glomerular filtration; hsCRP, high-sensitive C-reactive protein; HDL-C, high-density lipoprotein cholesterol; IQR, interquartile range; LDL-C, low-density lipoprotein cholesterol; PAD, peripheral artery disease; PCI, percutaneous coronary intervention; SD, standard deviation. |                                         |                                        |         |
| * Residual CAD was defined as $\geq 40\%$ stenosis in $\geq 2$ major vessels.                                                                                                                                                                                                                                                                                          |                                         |                                        |         |

**eTable 2.** Achievement of recommended LDL-C targets at 4 weeks in patients with recent MI ( $\leq 12$  months) vs remote MI ( $> 12$  months)

| LDL-C at 4 weeks                                          | Recent ( $\leq 12$ months) |                   |         | Remote ( $> 12$ months) |                   |         |
|-----------------------------------------------------------|----------------------------|-------------------|---------|-------------------------|-------------------|---------|
|                                                           | Evolocumab<br>N=2690       | Placebo<br>N=2764 | P-Value | Evolocumab<br>N=8047    | Placebo<br>N=7990 | P-value |
| <b>LDL-C Targets</b>                                      |                            |                   |         |                         |                   |         |
| LDL-C < 70 mg/dL, n (%)                                   | 2467 (91.7)                | 502 (18.2)        | <0.001  | 7271 (90.4)             | 1361 (17.0)       | <0.001  |
| LDL-C < 55 mg/dL, n (%)                                   | 2254 (83.8)                | 124 (4.5)         | <0.001  | 6700 (83.3)             | 305 (3.8)         | <0.001  |
| LDL-C < 40 mg/dL, n (%)                                   | 1717 (63.8)                | 9 (0.3)           | <0.001  | 5081 (63.1)             | 26 (0.3)          | <0.001  |
| Abbreviations: LDL-C, low density lipoprotein-cholesterol |                            |                   |         |                         |                   |         |

**eTable 3.** Efficacy of evolocumab in patients with recent MI ( $\leq 12$  months) vs remote MI ( $> 12$  months)

| Outcomes                                                                                                             | Recent ( $\leq 12$ months)                            |                                                    |                                  | Remote ( $> 12$ months)                               |                                                    |                                  | P-int |
|----------------------------------------------------------------------------------------------------------------------|-------------------------------------------------------|----------------------------------------------------|----------------------------------|-------------------------------------------------------|----------------------------------------------------|----------------------------------|-------|
|                                                                                                                      | Evolocumab<br>N Event<br>(Kaplan-<br>Meier<br>Rate %) | Placebo<br>N Event<br>(Kaplan-<br>Meier<br>Rate %) | HR<br>(95%<br>CI)<br><br>P=0.004 | Evolocumab<br>N Event<br>(Kaplan-<br>Meier<br>Rate %) | Placebo<br>N Event<br>(Kaplan-<br>Meier<br>Rate %) | HR<br>(95%<br>CI)<br><br>P=0.075 |       |
| <b>Primary Endpoint</b>                                                                                              |                                                       |                                                    |                                  |                                                       |                                                    |                                  |       |
| Cardiovascular death, myocardial infarction, stroke, hospitalization for unstable angina, coronary revascularization | 323 (13.5%)                                           | 408 (17.2%)                                        | 0.81 (0.70-0.93)<br>P=0.004      | 851 (13.3%)                                           | 921 (14.4%)                                        | 0.92 (0.84-1.01)<br>P=0.075      | 0.13  |
| <b>Key Secondary Endpoint</b>                                                                                        |                                                       |                                                    |                                  |                                                       |                                                    |                                  |       |
| Cardiovascular death, myocardial infarction, stroke                                                                  | 182 (7.7%)                                            | 248 (10.9%)                                        | 0.75 (0.62-0.91)<br>P=0.003      | 502 (8.2%)                                            | 584 (9.5%)                                         | 0.85 (0.76-0.96)<br>P=0.009      | 0.24  |
| <b>Additional Secondary Endpoints</b>                                                                                |                                                       |                                                    |                                  |                                                       |                                                    |                                  |       |
| Cardiovascular death or myocardial infarction                                                                        | 164 (7.0%)                                            | 222 (9.6%)                                         | 0.75 (0.61-0.92)<br>P=0.006      | 419 (6.7%)                                            | 481 (8.0%)                                         | 0.87 (0.76-0.99)<br>P=0.032      | 0.24  |
| Cardiovascular death                                                                                                 | 50 (2.3%)                                             | 52 (2.5%)                                          | 1.00 (0.68-1.47)<br>P=0.99       | 156 (2.5%)                                            | 136 (2.2%)                                         | 1.15 (0.91-1.44)<br>P=0.24       | 0.53  |
| Myocardial infarction                                                                                                | 127 (5.2%)                                            | 191 (8.0%)                                         | 0.67 (0.54-0.84)<br>P<0.001      | 296 (4.8%)                                            | 379 (6.4%)                                         | 0.78 (0.67-0.91)<br>P=0.001      | 0.30  |
| Stroke                                                                                                               | 30 (1.3%)                                             | 38 (1.9%)                                          | 0.81 (0.50-1.31)<br>P=0.39       | 110 (2.0%)                                            | 137 (2.2%)                                         | 0.80 (0.62-1.03)<br>P=0.081      | 0.94  |
| Coronary revascularization                                                                                           | 206 (8.8%)                                            | 283 (12.1%)                                        | 0.74 (0.62-0.89)<br>P=0.001      | 489 (7.5%)                                            | 577 (9.1%)                                         | 0.84 (0.75-0.95)<br>P=0.006      | 0.23  |

HRs and 95% confidence intervals (CI) for the effect of evolocumab versus placebo in recent vs. remote MI patients were generated with a Cox proportional hazards model with stratification factors of final screening LDL cholesterol and region as covariates.

**eTable 4.** Efficacy of evolocumab on the primary and key secondary end points by key subgroups

| Primary endpoint (CV death, MI, stroke, hospitalization for unstable angina and coronary revascularization)                                           |                               |       |                            |       |
|-------------------------------------------------------------------------------------------------------------------------------------------------------|-------------------------------|-------|----------------------------|-------|
| Subgroups                                                                                                                                             | Recent MI ( $\leq 12$ months) |       | Remote MI ( $> 12$ months) |       |
|                                                                                                                                                       | HR (95% CI)                   | P-int | HR (95% CI)                | P-int |
| Baseline high-intensity statin                                                                                                                        | 0.78 (0.66-0.93)              | 0.46  | 0.94 (0.85-1.05)           | 0.36  |
| No baseline high-intensity statin                                                                                                                     | 0.88 (0.66-1.18)              |       | 0.85 (0.71-1.02)           |       |
| Baseline LDL-C $<70$ mg/dL                                                                                                                            | 0.92 (0.53-1.62)              | 0.70  | 0.78 (0.54-1.13)           | 0.37  |
| Baseline LDL-C $\geq 70$ mg/dL                                                                                                                        | 0.80 (0.69-0.93)              |       | 0.93 (0.84-1.02)           |       |
| Key secondary endpoint (CV death, MI or stroke)                                                                                                       |                               |       |                            |       |
|                                                                                                                                                       | Recent MI ( $\leq 12$ months) |       | Remote MI ( $> 12$ months) |       |
|                                                                                                                                                       | HR (95% CI)                   | P-int | HR (95% CI)                | P-int |
| Baseline high-intensity statin                                                                                                                        | 0.76 (0.61-0.95)              | 0.89  | 0.87 (0.75-1.00)           | 0.67  |
| No baseline high-intensity statin                                                                                                                     | 0.72 (0.49-1.05)              |       | 0.82 (0.65-1.03)           |       |
| Baseline LDL-C $<70$ mg/dL                                                                                                                            | 0.77 (0.34-1.75)              | 0.92  | 0.68 (0.43-1.07)           | 0.29  |
| Baseline LDL-C $\geq 70$ mg/dL                                                                                                                        | 0.75 (0.62-0.91)              |       | 0.87 (0.77-0.98)           |       |
| Abbreviations: CI, confidence intervals; CV, cardiovascular; HR, hazard ratio; LDL-C, low-density lipoprotein-cholesterol; MI, myocardial infarction. |                               |       |                            |       |
